# Supplementary material
Source: publisher figshare collection journal article supplement (https://gsapubs.figshare.com/ndownloader/files/37378186)
Supplement: Supplementary file 1 [file 37378186]

## Sheet: Plume height
Table S3			Coarse trend = unimodal distributions + coarse subpopulations (distal unimodal distributions excluded)						Fine trend = fine subpopulations
			Distribution of the Median Diameter (Md in mm)						Distribution of the Median Diameter (Md in mm)
	Eruption Type	Max plume height above vent	Lower whisker	25th percentile	Median	75th percentile	Upper whisker	Number of observations	Lower whisker	25th percentile	Median	75th percentile	Upper whisker	Number of observations
≤10 km from vent
	Magmatic	> 30 km	0.0638133	0.152534	0.188156	0.286817	0.536	12
	Magmatic	20 - 30 km	0.183011	0.657471	2.2974	5.37029	12.1257	34	0.025	0.0282912	0.0320156	0.0362304	0.041	8
	Magmatic	10 - 20 km	0.895025	2.82843	4.59479	6.21132	19.9733	61	0.821994	0.821994	0.821994	0.821994	0.821994	16
	Magmatic	0 - 10 km	0.814938	3.33594	7.1678	12.0369	33.7633	63	0.0339605	0.0392817	0.0449667	0.050942	0.0649782	1
	Phreatomagmatic		1.61328	3.79737	5.27803	7.1602	16.3826	29	0.0961299	0.105678	0.123744	0.143987	0.167541	2
10 to 50 km from vent
	Magmatic	> 30 km	0.0719132	0.119956	0.155464	0.189356	0.25	112	0.00887892	0.0149666	0.019	0.0397748	0.11731	2
	Magmatic	20 - 30 km	0.047	0.223756	0.418994	0.757858	3.4822	95	0.019915	0.0289559	0.0339605	0.0384733	0.0551689	19
	Magmatic	10 - 20 km	0.0532897	0.556012	1.17145	2.96869	18.6357	110	0.0572856	0.0770729	0.0985882	0.10702	0.174009	43
	Magmatic	0 - 10 km	0.206442	1.25163	2.37449	4.61706	19.5112	96	0.0150771	0.0152346	0.0153939	0.0155548	0.0157173	7
	Phreatomagmatic		0.466516	2.14355	4	6.16884	24.1776	26
50 to 100 km from vent
	Magmatic	> 30 km	0.102	0.132669	0.144466	0.16395	0.192	50	0.012	0.0132431	0.0158745	0.0187449	0.02	6
	Magmatic	20 - 30 km	0.044	0.0842021	0.153031	0.233145	0.329877	35	0.0194148	0.0232424	0.0278245	0.03331	0.039877	17
	Magmatic	10 - 20 km	0.0587202	0.148111	0.271684	0.31864	0.492092	22	0.0203335	0.0215675	0.0246034	0.0295643	0.0339605	6
	Magmatic	0 - 10 km	0.172014	0.508917	0.697795	1.0518	2.34096	26	0.060253	0.0795445	0.101109	0.11765	0.194949	2
	Phreatomagmatic		0.0227183	0.326223	1.90763	2.73431	4.71508	10	0.0238098	0.0244561	0.0270514	0.0287813	0.0306219	6
100 to 200 km from vent
	Magmatic	> 30 km	0.0476956	0.07966	0.0947323	0.11908	0.191074	53	0.0279812	0.0347462	0.0385346	0.0451854	0.0451854	14
	Magmatic	20 - 30 km	0.03125	0.0625	0.0909363	0.183662	0.560933	25	0.0118415	0.0134151	0.0150928	0.0157337	0.0157337	7
	Magmatic	10 - 20 km	0.20212	0.208646	0.287175	0.337204	0.605244	32	0.0130482	0.0132304	0.0136024	0.0155709	0.0172173	5
	Magmatic	0 - 10 km	0.0266448	0.176777	0.623068	0.937597	1.85276	58	0.0181561	0.0246644	0.027805	0.0315823	0.0408818	5
200 to 500 km from vent
	Magmatic	> 30 km	0.0277763	0.0448111	0.0625	0.0824692	0.178167	23	0.0112028	0.0120277	0.0144779	0.015785	0.0163281	13
	Magmatic	20 - 30 km	0.0660636	0.0710511	0.0934281	0.122587	0.138696	16	0.0126914	0.0132304	0.0134151	0.0136024	0.0136024	12
	Magmatic	10 - 20 km	0.0281641	0.0805199	0.19545	0.275153	0.61106	41	0.00252273	0.0103804	0.0281429	0.0365544	0.049095	6
500 - 1000 km from vent
	Magmatic	> 30 km	0.0473661	0.0553605	0.0615008	0.065386	0.0669858	8	0.0197049	0.0197049	0.0197049	0.0197049	0.0197049	7
	Magmatic	20 - 30 km	0.03	0.03	0.03	0.03	0.03	1
	Magmatic	10 - 20 km	0.0551689	0.0848595	0.11422	0.129132	0.170229	4	0.0112807	0.0204611	0.0296543	0.039906	0.04276	1
> 1000 km from vent
	Magmatic	> 30 km	0.006	0.006	0.006	0.006	0.006	1
	Magmatic	20 - 30 km	0.0110485	0.0110485	0.0110485	0.0110485	0.0110485	1
